# Supplementary material for: Bone marrow fibrosis in myelodysplastic syndromes: a prospective evaluation including mutational analysis
Source: PubMed Central journal article supplement (PMC5058695; doi:10.18632/oncotarget.9026), 2016-04-26
Supplement: oncotarget-07-30492-s001.pdf [file oncotarget-07-30492-s001.pdf]

# Bone marrow fibrosis in myelodysplastic syndromes: a prospective evaluation including mutational analysis

## Supplementary Material

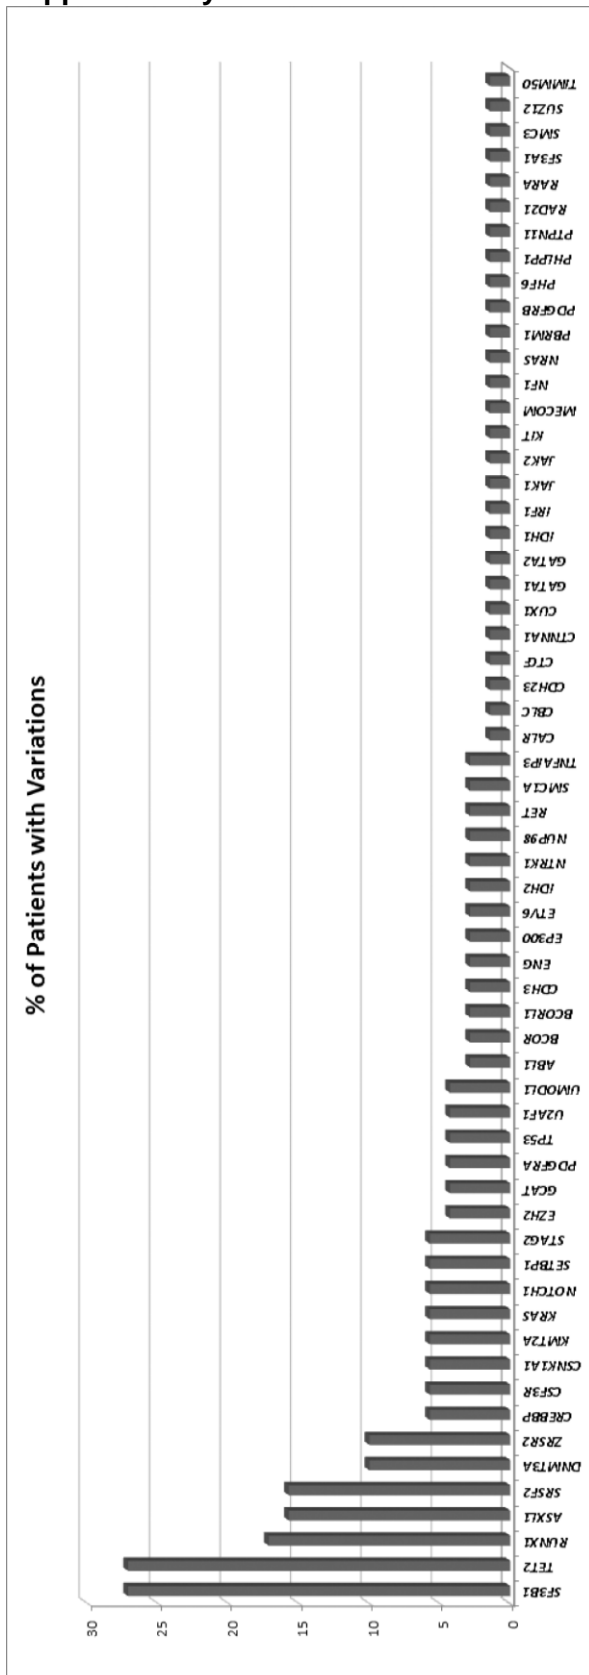

Supplemental Fig. 1. Frequency of gene mutations in 70 MDS patients.

**Supplemental Table 1.** Genes involved in MDS pathogenesis grouped into functional pathways.

| Gene          | Functional pathways    | Gene           | Functional pathways | Gene          | Functional pathways |
|---------------|------------------------|----------------|---------------------|---------------|---------------------|
| <i>ASXL1</i>  | Chromatin modification | <i>ABL1</i>    | Signalling          | <i>CUX1</i>   | Transcription       |
| <i>BCOR</i>   | Chromatin modification | <i>CBLC</i>    | Signalling          | <i>ETV6</i>   | Transcription       |
| <i>BCORL1</i> | Chromatin modification | <i>CDH3</i>    | Signalling          | <i>GATA1</i>  | Transcription       |
| <i>CREBPP</i> | Chromatin modification | <i>CSF3R</i>   | Signalling          | <i>GATA2</i>  | Transcription       |
| <i>EP300</i>  | Chromatin modification | <i>CSNK1A1</i> | Signalling          | <i>PHF6</i>   | Transcription       |
| <i>EZH2</i>   | Chromatin modification | <i>CTNNA1</i>  | Signalling          | <i>RUNX1</i>  | Transcription       |
| <i>KMT2A</i>  | Chromatin modification | <i>ENG</i>     | Signalling          | <i>TP53</i>   | Transcription       |
| <i>MECOM</i>  | Chromatin modification | <i>IRF1</i>    | Signalling          | <i>UMODL1</i> | Transcription       |
| <i>PBRM1</i>  | Chromatin modification | <i>JAK1</i>    | Signalling          |               |                     |
| <i>SETBP1</i> | Chromatin modification | <i>JAK2</i>    | Signalling          |               |                     |
| <i>SUZ12</i>  | Chromatin modification | <i>KIT</i>     | Signalling          |               |                     |
|               |                        | <i>KRAS</i>    | Signalling          |               |                     |
| <i>SF3A1</i>  | RNA splicing           | <i>NF1</i>     | Signalling          | <i>DNMT3A</i> | DNA methylation     |
| <i>SF3B1</i>  | RNA splicing           | <i>NOTCH1</i>  | Signalling          | <i>IDH1</i>   | DNA methylation     |
| <i>SRSF2</i>  | RNA splicing           | <i>NRAS</i>    | Signalling          | <i>IDH2</i>   | DNA methylation     |
| <i>UA2F1</i>  | RNA splicing           | <i>NTRK1</i>   | Signalling          | <i>TET2</i>   | DNA methylation     |
| <i>ZRSR2</i>  | RNA splicing           | <i>PDGFRA</i>  | Signalling          |               |                     |
|               |                        | <i>PDGFRB</i>  | Signalling          |               |                     |
| <i>CTCF</i>   | Cohesin complex        | <i>PHLPP1</i>  | Signalling          | <i>CALR</i>   | Others              |
| <i>RAD21</i>  | Cohesin complex        | <i>PTPN11</i>  | Signalling          | <i>CDH23</i>  | Others              |
| <i>SMC1A</i>  | Cohesin complex        | <i>RARA</i>    | Signalling          | <i>GCAT</i>   | Others              |
| <i>SMC3</i>   | Cohesin complex        | <i>RET</i>     | Signalling          | <i>NUP98</i>  | Others              |
| <i>STAG2</i>  | Cohesin complex        | <i>TNFAIP3</i> | Signalling          | <i>TIMM50</i> | Others              |

**Supplemental Table 2.** Comparative findings between myelodysplastic syndrome cases with or without relevant bone marrow fibrosis. PANEL A. Demographics and peripheral blood findings.

|                                               | <b>MF-0/1</b>   | <b>MF-2/3</b>    | <b>p-value</b> |
|-----------------------------------------------|-----------------|------------------|----------------|
| <i>No. of patients, (%)</i>                   | 60 (77.9)       | 17 (22.1)        |                |
| <b>DEMOGRAPHICS</b>                           |                 |                  |                |
| <b>Age at diagnosis</b>                       |                 |                  |                |
| <i>Median, (range), years</i>                 | 77 (70-82)      | 72 (64.5-80.5)   | 0.259          |
| <b>Gender</b>                                 |                 |                  |                |
| <i>Male, No. of patients, (%)</i>             | 38 (63.3)       | 14 (82.4)        | 0.240          |
| <b>Performance status (ECOG)</b>              |                 |                  |                |
| <i>No. of patients, (%)</i>                   |                 |                  |                |
| 0-1                                           | 47 (78.3)       | 12 (70.6)        | 0.840          |
| 2                                             | 7 (10.0)        | 5 (29.4)         |                |
| 3-4                                           | 7 (11.7)        | 0                |                |
| <b>Transfusion dependence</b>                 |                 |                  |                |
| <i>No. of patients, (%)</i>                   | 15 (25.5)       | 10 (58.8)        | 0.017          |
| <b>PERIPHERAL BLOOD</b>                       |                 |                  |                |
| <b>WBC count (x 10<sup>9</sup>/L)</b>         |                 |                  |                |
| <i>Median, (IQR)</i>                          | 3.9 (2.5-4.9)   | 3.5 (2.3-5.2)    | 0.968          |
| <b>Haemoglobin (g/L)</b>                      |                 |                  |                |
| <i>Median, (IQR)</i>                          | 10.0 (8.9-11.3) | 9.2 (7.1-10.3)   | 0.092          |
| <b>Platelet count (x 10<sup>9</sup>/L)</b>    |                 |                  |                |
| <i>Median, (IQR)</i>                          | 121 (72-246)    | 156 (81-267)     | 0.925          |
| <b>Blast cells (%)</b>                        |                 |                  |                |
| <i>Median, (range)</i>                        | 0 (0-0)         | 0 (0-0.5)        | 0.133          |
| <b>WT1/GUS ratio in PB (x10<sup>-4</sup>)</b> |                 |                  |                |
| <i>Median, (IQR)</i>                          | 3 (1.0–13.0)    | 30 (8.0-85.5)    | 0.003          |
| <b>SERUM</b>                                  |                 |                  |                |
| <b>Ferritin (ng/mL)</b>                       |                 |                  |                |
| <i>Median, (IQR)</i>                          | 309 (173-599)   | 578 (350-963)    | 0.025          |
| <b>LDH (U/L)</b>                              |                 |                  |                |
| <i>Median, (IQR)</i>                          | 372 (326-465)   | 401 (287-514)    | 0.235          |
| <b>EPO (U/L)</b>                              |                 |                  |                |
| <i>Median, (IQR)</i>                          | 58 (18-153)     | 134 (43.3-651.0) | 0.067          |
| <b>Beta2-m (mg/L)</b>                         |                 |                  |                |
| <i>Median, (IQR)</i>                          | 3.0 (2.2-4.5)   | 3.2 (2.5-3.6)    | 0.978          |
| <b>sp53 (U/mL)</b>                            |                 |                  |                |
| <i>Median, (IQR)</i>                          | 1.6 (0-3.4)     | 1.7 (1.1-2.9)    | 0.593          |
| <b>TNF alpha (pg/mL)</b>                      |                 |                  |                |
| <i>Median, (IQR)</i>                          | 0 (0-0)         | 0 (0-0)          | 0.504          |
| <b>IL6 (pg/mL)</b>                            |                 |                  |                |
| <i>Median, (IQR)</i>                          | 0 (0-6.9)       | 0 (0-0)          | 0.152          |
| <b>IL1 beta (pg/mL)</b>                       |                 |                  |                |
| <i>Median, (IQR)</i>                          | 0 (0-0)         | 0 (0-0)          | 0.732          |
| <b>CXCL8 (pg/mL)</b>                          |                 |                  |                |
| <i>Median, (IQR)</i>                          | 0 (0-20.1)      | 0 (0-8.7)        | 0.174          |
| <b>CXCL9 (pg/mL)</b>                          |                 |                  |                |
| <i>Median, (IQR)</i>                          | 0 (0-164.2)     | 0 (0-0)          | 0.015          |
| <b>CXCL10 (pg/mL)</b>                         |                 |                  |                |
| <i>Median, (IQR)</i>                          | 0 (0-137.8)     | 0 (0-0)          | 0.055          |

**Supplemental Table 2.** Comparative findings between myelodysplastic syndrome cases with or without relevant bone marrow fibrosis. PANEL B. Other parameters of interest. HR=High risk ratio. BMT= Blood and marrow transplantation.

|                                       | <b>MF-0/1</b>  | <b>MF-2/3</b>    | <b>p-value</b> |
|---------------------------------------|----------------|------------------|----------------|
| <i>No. of patients, (%)</i>           | 60 (77.9)      | 17 (22.1)        |                |
| <b>BONE MARROW ASPIRATION</b>         |                |                  |                |
| <b>Blast cells at diagnosis (%)</b>   |                |                  |                |
| <i>Median, (IQR)</i>                  | 2.0 (0.6-4.8)  | 1.6 (0.9-4.2)    | 0.681          |
| <b>Red cell progenitors (%)</b>       |                |                  |                |
| <i>Median, (IQR)</i>                  | 35 (23.6-45.2) | 24.2 (15.4-32.5) | 0.050          |
| <b>BONE MARROW BIOPSY</b>             |                |                  |                |
| <b>Cellularity (%)</b>                |                |                  |                |
| <i>Median, (IQR)</i>                  | 55 (40-75)     | 80 (60-92.5)     | 0.006          |
| <b>p53 IHC score</b>                  |                |                  |                |
| <i>Median, (IQR)</i>                  | 1 (0-3)        | 2 (1.5-8.5)      | 0.027          |
| <b>Strong p53 reactivity (&gt;1%)</b> |                |                  |                |
| <i>No. of patients, (% out of 76)</i> | 7 (11.9)       | 4 (26.7)         | 0.217          |
| <b>ALIP</b>                           |                |                  |                |
| <i>No. of patients, (%)</i>           | 15 (25.0)      | 11 (64.7)        | 0.004          |
| <b>SCHANZ'S CYTOGENETIC STRATA</b>    |                |                  |                |
| <i>No. of patients, (%)</i>           |                |                  |                |
| Very good/good                        | 43 (71.7)      | 12 (70.6)        | 0.458          |
| Intermediate                          | 7 (11.7)       | 5 (29.4)         |                |
| Poor/very poor                        | 10 (16.7)      | 0                |                |
| <b>IPSS-R CATEGORY</b>                |                |                  |                |
| <i>No. of patients, (%)</i>           |                |                  |                |
| Very good/good                        | 36 (60.0)      | 12 (70.6)        | 0.617          |
| Intermediate                          | 11 (18.3)      | 2 (11.8)         |                |
| Poor/very poor                        | 13 (21.7)      | 3 (17.6)         |                |
| <b>FUNCTIONAL PATHWAYS</b>            |                |                  |                |
| <i>No. of patients, (%)</i>           | 56 (80.0)      | 14 (20.0)        |                |
| <i>Splicing</i>                       | 27 (48.2)      | 9 (64.3)         | 0.374          |
| <i>Signalling</i>                     | 26 (46.4)      | 8 (57.1)         | 0.557          |
| <i>Chromatin modification</i>         | 19 (33.9)      | 7 (50.0)         | 0.356          |
| <i>Transcription regulation</i>       | 16 (28.6)      | 6 (42.9)         | 0.344          |
| <i>Methylation</i>                    | 20 (35.7)      | 7 (50.7)         | 0.368          |
| <i>Cohesin complex</i>                | 3 (5.4)        | 5 (35.7)         | 0.006          |
| <i>Bejar's HR score</i>               | 17 (30.4)      | 9 (64.3)         | 0.029          |
| <b>THERAPY</b>                        |                |                  |                |
| <i>No. of patients, (%)</i>           |                |                  |                |
| Azacitidine                           | 15 (25.5)      | 5 (29.4)         | 0.758          |
| Intensive chemotherapy                | 7 (11.7)       | 3 (17.6)         | 0.683          |
| BMT                                   | 6 (10.0)       | 2 (11.8)         | 0.834          |

**Supplemental Table 3.** Main patient characteristics at diagnosis. PANEL A.  
Demographics and peripheral blood findings.

**DEMOGRAPHICS**

**Age at diagnosis**

*Median, (range), years* 76 (31-88)

**Gender**

*Male, No. of patients, (%)* 52 (67.5)

**Performance status (ECOG)**

*No. of patients, (%)*

0-1 59 (76.6)

2 11 (14.3)

3-4 7 (9.1)

**Transfusion dependence**

*No. of patients, (%)* 27 (35.1)

**PERIPHERAL BLOOD**

**WBC count (x 10<sup>9</sup>/L)**

*Median, (range)* 3.9 (0.9-15.4)

*IQR* 2.5-4.9

**Haemoglobin (g/L)**

*Median, (range)* 9.9 (5.9-16.1)

*IQR* 8.6-13.0

**Platelet count (x 10<sup>9</sup>/L)**

*Median, (range)* 122 (9-1067)

*IQR* 72-247

**Blast cells (%)**

*Median, (range)* 0 (0-5)

*IQR* 0-0

**WT1/GUS ratio in PB (x10<sup>-3</sup>)**

*Median, (range)* 0.5 (0-654.5)

*IQR* 1.0-31.0

**SERUM**

**Ferritin (ng/mL)**

*Median, (range)* 375 (27-1495)

*IQR* 189-633

**LDH (U/L)**

*Median, (range)* 377 (120-922)

*IQR* 319-473

**EPO (U/L)**

*Median, (range)* 59 (7-1536)

*IQR* 21-175

**Beta2-m (mg/L)**

*Median, (range)* 3.1 (1.3-12.7)

*IQR* 2.2-4.0

**sp53 (U/mL)**

*Median, (range)* 1.70 (0-6.25)

*IQR* 0-3.05

**TNF alpha (pg/mL)**

*Median, (range)* 0 (0-195.6)

*IQR* 0-0

**IL6 (pg/mL)**

*Median, (range)* 0 (0-111.1)

*IQR* 0-7.6

**IL1 beta ((pg/mL)**

*Median, (range)* 0 (0-160.3)

*IQR* 0-0

**CXCL8 ((pg/mL)**

*Median, (range)* 0 (0-339.7)

*IQR* 0-19.4

**CXCL9 (pg/mL)**

*Median, (range)* 0 (0-2204.2)

*IQR* 0-341.0

**CXCL10 ((pg/mL)**

*Median, (range)* 0 (0-893.3)

*IQR* 0-125.8

**Supplemental Table 3.** Main patient characteristics at diagnosis. PANEL B. Bone marrow, classification, IPSS-R and OS.

|                                            |                 |
|--------------------------------------------|-----------------|
| <b>BONE MARROW ASPIRATION</b>              |                 |
| <b>Blast cells at diagnosis (%)</b>        |                 |
| <i>Median, (range)</i>                     | 2.0 (0-19)      |
| <i>IQR</i>                                 | 0.6-4.9         |
| <b>Red cell progenitors (%)</b>            |                 |
| <i>Median, (range)</i>                     | 33 (7.8-64.0)   |
| <i>IQR</i>                                 | 23.2-41.5       |
| <b>SCHANZ'S CYTOGENETIC STRATA</b>         |                 |
| <i>No. of patients, (%)</i>                |                 |
| Very good                                  | 4 (5.2)         |
| Good                                       | 51 (66.2)       |
| Intermediate                               | 12 (15.6)       |
| Poor                                       | 5 (6.5)         |
| Very poor                                  | 5 (6.5)         |
| <b>BONE MARROW BIOPSY</b>                  |                 |
| <b>Cellularity (%)</b>                     |                 |
| <i>Median, (range)</i>                     | 60 (1-95)       |
| <i>IQR</i>                                 | 40-80           |
| <b>Fibrosis grade (European consensus)</b> |                 |
| <i>No. of patients, (%)</i>                |                 |
| MF - 0                                     | 29 (37.7)       |
| MF - 1                                     | 31 (40.3)       |
| MF - 2                                     | 15 (19.5)       |
| MF - 3                                     | 2 (2.6)         |
| <b>Fibrosis pattern</b>                    |                 |
| <i>No. of patients, (%)</i>                |                 |
| Absent                                     | 28 (36.4)       |
| Focal                                      | 21 (27.3)       |
| Diffuse                                    | 28 (36.4)       |
| <b>ALIP</b>                                |                 |
| <i>No. of patients, (%)</i>                | 26 (33.8%)      |
| <b>p53 IHC score</b>                       |                 |
| <i>Median, (range)</i>                     | 1 (0-460)       |
| <i>IQR</i>                                 | 1-4             |
| <b>Strong p53 IHC reactivity (&gt;1%)</b>  |                 |
| <i>No. of patients, (% out of 76)</i>      | 11 (14.5)       |
| <b>WHO CLASSIFICATION CATEGORY</b>         |                 |
| <i>No. of patients, (%)</i>                |                 |
| RCUD                                       | 2 (2.6)         |
| RARS                                       | 4 (5.2)         |
| RCMD                                       | 40 (51.9)       |
| RAEB-1                                     | 15 (19.5)       |
| RAEB-2                                     | 7 (9.1)         |
| 5q-                                        | 7 (9.1)         |
| MDS-U                                      | 2 (2.6)         |
| <b>IPSS-R CATEGORY</b>                     |                 |
| <i>No. of patients, (%)</i>                |                 |
| Very good                                  | 15 (19.5)       |
| Good                                       | 33 (42.9)       |
| Intermediate                               | 13 (16.9)       |
| Poor                                       | 10 (13.0)       |
| Very poor                                  | 6 (7.8)         |
| <b>OVERALL SURVIVAL</b>                    |                 |
| <b>MF-0</b>                                |                 |
| <i>No. of patients, (%)</i>                | 29 (37.7)       |
| <i>Median (years), CI95%</i>               | 4.0 (1.92-6.09) |
| <b>MF-1</b>                                |                 |
| <i>No. of patients, (%)</i>                | 31 (41.3)       |
| <i>Median (years), CI95%</i>               | 3.9 (0.29-7.46) |
| <b>MF-2/3</b>                              |                 |
| <i>No. of patients, (%)</i>                | 17 (22.1)       |
| <i>Median (years), CI95%</i>               | 1.2 (0-3.29)    |

**Supplemental Table 4.** WHO subtype distribution in cohesin complex mutated and non-mutated cases.

RCUD, Refractory cytopenia with unilineage dysplasia; RARS, Refractory anemia with ring sideroblasts; RCMD, refractory cytopenia with multilineage dysplasia; RAEB-1, Refractory anemia with excess blasts type 1; RAEB-2, Refractory anemia with excess blasts type 2; 5q-, MDS with isolated del(5q); MDS-U, MDS-unclassified.

|                                    | RCUD | RARS | RCMD         | RAEB-1       | RAEB-2 | 5q-          | MDS-U | Total |
|------------------------------------|------|------|--------------|--------------|--------|--------------|-------|-------|
| <b>Cohesin complex non-mutated</b> | 2    | 3    | 32           | 11           | 6      | 6            | 2     | 62    |
| <b>Cohesin complex mutated</b>     | 0    | 0    | 4<br>(11.1%) | 3<br>(21.4%) | 0      | 1<br>(14.3%) | 0     | 8     |
| <b>Total</b>                       | 2    | 3    | 36           | 14           | 6      | 7            | 2     | 70    |

**Supplemental Table 5.** IPSS-R strata distribution in cohesin complex mutated and non-mutated cases.

|                                    | Very good    | Good        | Intermediate | Poor         | Very poor | Total |
|------------------------------------|--------------|-------------|--------------|--------------|-----------|-------|
| <b>Cohesin complex non-mutated</b> | 13           | 28          | 8            | 7            | 6         | 62    |
| <b>Cohesin complex mutated</b>     | 1<br>(47.8%) | 3<br>(9.7%) | 3<br>(27.3%) | 1<br>(14.3%) | 0         | 8     |
| <b>Total</b>                       | 14           | 31          | 11           | 8            | 7         | 70    |
