# Supplementary material for: Bone marrow fibrosis in myelodysplastic syndromes: a prospective evaluation including mutational analysis
Source: PubMed Central journal article supplement (PMC5058695; doi:10.18632/oncotarget.9026), 2016-04-26
Supplement: oncotarget-07-30492-s002.pdf [file oncotarget-07-30492-s002.pdf]

**Bone marrow fibrosis in MDS: Raw mutational data.** Ramos et al.

| Gene           | Chromosome | Coordinate | Type      | Variant | Change             | Alt Variant Freq | % patients with variation | UPN    |
|----------------|------------|------------|-----------|---------|--------------------|------------------|---------------------------|--------|
| <i>ABL1</i>    | 9          | 133729537  | snv       | G>G/A   | p.Ala75Thr         | 41.98            | 1,4                       | 20     |
| <i>ABL1</i>    | 9          | 133748312  | snv       | G>G/A   | p.Asp344Asn        | 13.01            | 1,4                       | 26     |
| <i>ASXL1</i>   | 20         | 31022562   | insertion | A>A/AC  | p.Gly685TrpfsTer33 | 30.71            | 1,4                       | 54     |
| <i>ASXL1</i>   | 20         | 31022592   | snv       | C>C/T   | p.Arg693Ter        | 31.65            | 1,4                       | 3      |
| <i>ASXL1</i>   | 20         | 31022639   | insertion | G>G/GGC | p.Gly710ProfsTer16 | 29.74            | 1,4                       | 24     |
| <i>ASXL1</i>   | 20         | 31022737   | snv       | A>A/T   | p.Asp741Val        | 51.41            | 1,4                       | 51     |
| <i>ASXL1</i>   | 20         | 31022898   | deletion  | TC>TC/T | p.Trp796GlyfsTer22 | 21.5             | 1,4                       | 15     |
| <i>ASXL1</i>   | 20         | 31022936   | deletion  | TC>TC/T | p.Pro808LeufsTer10 | 23.08            | 1,4                       | 26     |
| <i>ASXL1</i>   | 20         | 31022981   | deletion  | AT>AT/A | p.Leu823Ter        | 2.27             | 1,4                       | 36     |
| <i>ASXL1</i>   | 20         | 31023717   | snv       | C>C/T   | p.Arg1068Ter       | 3.83             | 1,4                       | 13     |
| <i>ASXL1</i>   | 20         | 31023821   | snv       | G>G/T   | p.Glu1102Asp       | 50.57; 43.68     | 2,8                       | 13; 50 |
| <i>ASXL1</i>   | 20         | 31024482   | snv       | A>A/G   | p.Met1323Val       | 40               | 1,4                       | 19     |
| <i>ASXL1</i>   | 20         | 31024587   | snv       | C>C/G   | p.Pro1358Ala       | 42.35            | 1,4                       | 55     |
| <i>BCOR</i>    | X          | 39932235   | snv       | G>C/C   | p.Asn788Lys        | 99.57            | 1,4                       | 50     |
| <i>BCOR</i>    | X          | 39934149   | insertion | T>T/TC  | p.Thr151AsnfsTer35 | 26.41            | 1,4                       | 39     |
| <i>BCORL1</i>  | X          | 129150080  | snv       | C>C/T   | p.Thr1111Met       | 52.39            | 1,4                       | 12     |
| <i>BCORL1</i>  | X          | 129159070  | snv       | G>G/A   | p.Arg1265His       | 98.37            | 1,4                       | 7      |
| <i>CALR</i>    | 19         | 13050317   | snv       | C>C/T   | p.Thr90Met         | 44.33            | 1,4                       | 15     |
| <i>CBLC</i>    | 19         | 45295664   | snv       | A>A/G   | p.Met344Val        | 47.31            | 1,4                       | 60     |
| <i>CDH23</i>   | 10         | 73406232   | snv       | G>G/A   | p.Ser436Asn        | 54.98            | 1,4                       | 2      |
| <i>CDH3</i>    | 16         | 68719119   | snv       | T>T/C   | p.Leu479Pro        | 52.55; 51.41     | 2,8                       | 23; 25 |
| <i>CREBBP</i>  | 16         | 3778068    | snv       | G>G/A   | p.Ala2327Val       | 39.86            | 1,4                       | 10     |
| <i>CREBBP</i>  | 16         | 3786752    | snv       | G>G/T   | p.His1487Asn       | 13.36            | 1,4                       | 53     |
| <i>CREBBP</i>  | 16         | 3820723    | snv       | T>T/C   | p.Thr910Ala        | 43.43            | 1,4                       | 42     |
| <i>CREBBP</i>  | 16         | 3820773    | snv       | G>G/A   | p.Ser893Leu        | 51.13            | 1,4                       | 32     |
| <i>CSF3R</i>   | 1          | 36932047   | snv       | C>C/T   | p.Glu835Lys        | 47.82; 38.61     | 2,9                       | 32; 47 |
| <i>CSF3R</i>   | 1          | 36933539   | snv       | C>C/T   | p.Arg583His        | 38.6             | 1,4                       | 2      |
| <i>CSF3R</i>   | 1          | 36945058   | snv       | G>G/C   | p.Leu14Val         | 52.43            | 1,4                       | 29     |
| <i>CSNK1A1</i> | 5          | 148891396  | snv       | C>C/A   | p.Met240Ile        | 13.46            | 1,4                       | 8      |
| <i>CSNK1A1</i> | 5          | 148892666  | snv       | G>G/C   | p.Ala216Gly        | 3.38             | 1,4                       | 12     |
| <i>CSNK1A1</i> | 5          | 148899890  | snv       | T>T/G   | p.Asp140Ala        | 6.79; 18.54      | 2,8                       | 7; 50  |
| <i>CTCF</i>    | 16         | 67645067   | snv       | G>G/A   | p.Gly111Glu        | 51.28            | 1,4                       | 31     |
| <i>CTNNA1</i>  | 5          | 138268312  | snv       | C>C/T   | p.Arg782Cys        | 48.53            | 1,4                       | 34     |

| Gene          | Chromosome | Coordinate | Type      | Variant     | Change             | Alt Variant Freq | % patients with variation | UPN    |
|---------------|------------|------------|-----------|-------------|--------------------|------------------|---------------------------|--------|
| <i>CUX1</i>   | 7          | 101840555  | insertion | G>G/GCCCT   | p.Arg635ProfsTer3  | 11.62            | 1,4                       | 28     |
| <i>DNMT3A</i> | 2          | 25457243   | snv       | G>G/A       | p.Arg882Cys        | 31.64            | 1,4                       | 28     |
| <i>DNMT3A</i> | 2          | 25457249   | snv       | T>T/C       | p.Met880Val        | 6.83             | 1,4                       | 17     |
| <i>DNMT3A</i> | 2          | 25463297   | deletion  | AAAG>AAAG/A | p.Phe732del        | 16.23            | 1,4                       | 6      |
| <i>DNMT3A</i> | 2          | 25463584   | snv       | G>G/C       | p.Pro700Ala        | 9.86             | 1,4                       | 45     |
| <i>DNMT3A</i> | 2          | 25466797   | snv       | C>C/T       | p.Val636Met        | 32.38            | 1,4                       | 15     |
| <i>DNMT3A</i> | 2          | 25469146   | snv       | C>C/T       | p.Asp438Asn        | 44.61            | 1,4                       | 41     |
| <i>DNMT3A</i> | 2          | 25469966   | insertion | T>T/TA      | p.Tyr359LeufsTer34 | 50.43            | 1,4                       | 10     |
| <i>ENG</i>    | 9          | 130588091  | snv       | C>C/T       | p.Gly191Asp        | 46.38; 45.88     | 2,8                       | 40; 63 |
| <i>EP300</i>  | 22         | 41527461   | snv       | C>C/A       | p.Pro451His        | 45.3             | 1,4                       | 6      |
| <i>EP300</i>  | 22         | 41542780   | snv       | T>T/G       | p.Ser697Arg        | 46.79            | 1,4                       | 60     |
| <i>ETV6</i>   | 12         | 12022522   | snv       | C>C/T       | p.Arg210Cys        | 50.11            | 1,4                       | 24     |
| <i>ETV6</i>   | 12         | 12022879   | snv       | G>G/A       | p.Ala329Thr        | 43.49            | 1,4                       | 26     |
| <i>EZH2</i>   | 7          | 148507456  | snv       | G>G/T       | p.Tyr666Ter        | 81.71            | 1,4                       | 55     |
| <i>EZH2</i>   | 7          | 148515122  | insertion | G>G/GCCGT   | p.Leu363ThrfsTer5  | 19.11            | 1,4                       | 24     |
| <i>EZH2</i>   | 7          | 148543610  | insertion | C>C/CTG     | p.Gln66HisfsTer7   | 14.09            | 1,4                       | 7      |
| <i>GATA1</i>  | X          | 48650344   | snv       | C>C/T       | p.Pro105Leu        | 41.09            | 1,4                       | 37     |
| <i>GATA2</i>  | 3          | 128204960  | snv       | G>G/C       | p.Pro161Ala        | 48.53            | 1,4                       | 39     |
| <i>GCAT</i>   | 22         | 38206126   | snv       | G>G/C       | p.Ala123Pro        | 10.97            | 1,4                       | 48     |
| <i>GCAT</i>   | 22         | 38212624   | snv       | C>C/T       | p.Arg413Trp        | 48.66; 51.15     | 2,8                       | 14; 30 |
| <i>IDH1</i>   | 2          | 209113113  | snv       | G>G/T       | p.Arg132Ser        | 9.2              | 1,4                       | 58     |
| <i>IDH2</i>   | 15         | 90631934   | snv       | C>C/T       | p.Arg140Gln        | 46.71; 29.71     | 2,8                       | 16; 40 |
| <i>IRF1</i>   | 5          | 131825088  | snv       | T>T/A       | p.Asn28Ile         | 9.49             | 1,4                       | 47     |
| <i>JAK1</i>   | 1          | 65313323   | snv       | G>G/C       | p.Ile597Met        | 49.13            | 1,4                       | 27     |
| <i>JAK2</i>   | 9          | 5073770    | snv       | G>G/T       | p.Val617Phe        | 8.87             | 1,4                       | 57     |
| <i>KIT</i>    | 4          | 55594279   | snv       | C>C/A       | p.Thr661Asn        | 4.08             | 1,4                       | 11     |
| <i>KMT2A</i>  | 11         | 118344005  | snv       | A>A/G       | p.Ile711Val        | 48.78            | 1,4                       | 38     |
| <i>KMT2A</i>  | 11         | 118352565  | snv       | G>G/T       | p.Ser1257Ile       | 48.61            | 1,4                       | 1      |
| <i>KMT2A</i>  | 11         | 118355592  | snv       | G>G/A       | p.Glu1412Lys       | 44.89            | 1,4                       | 42     |
| <i>KMT2A</i>  | 11         | 118373307  | snv       | G>G/A       | p.Gly2234Arg       | 44.62            | 1,4                       | 38     |
| <i>KMT2A</i>  | 11         | 118375572  | snv       | G>G/A       | p.Glu2989Lys       | 48.74            | 1,4                       | 39     |

| Gene          | Chromosome | Coordinate | Type     | Variant   | Change            | Alt Variant Freq | % patients with variation | UPN    |
|---------------|------------|------------|----------|-----------|-------------------|------------------|---------------------------|--------|
| <i>KRAS</i>   | 12         | 25398262   | snv      | C>C/A     | p.Leu19Phe        | 9.42             | 1,4                       | 55     |
| <i>KRAS</i>   | 12         | 25398281   | snv      | C>C/T     | p.Gly13Asp        | 8.85             | 1,4                       | 30     |
| <i>KRAS</i>   | 12         | 25398282   | snv      | C>C/A     | p.Gly13Cys        | 8.4              | 1,4                       | 59     |
| <i>KRAS</i>   | 12         | 25398284   | snv      | C>C/T     | p.Gly12Asp        | 5.08             | 1,4                       | 31     |
| <i>MECOM</i>  | 3          | 168861536  | snv      | C>C/A     | p.Ala154Ser       | 48.41            | 1,4                       | 60     |
| <i>NF1</i>    | 17         | 29557906   | snv      | A>A/C     | p.Asn1054His      | 5.34             | 1,4                       | 59     |
| <i>NOTCH1</i> | 9          | 139390585  | snv      | C>C/T     | p.Val2536Ile      | 48.89            | 1,4                       | 48     |
| <i>NOTCH1</i> | 9          | 139390941  | snv      | G>G/A     | p.Pro2417Leu      | 43.33; 48.58     | 2,8                       | 13; 27 |
| <i>NOTCH1</i> | 9          | 139399132  | snv      | C>C/T     | p.Val1671Ile      | 58.2             | 1,4                       | 5      |
| <i>NRAS</i>   | 1          | 115256529  | snv      | T>T/G     | p.Gln61Pro        | 9.33             | 1,4                       | 59     |
| <i>NRAS</i>   | 1          | 115258747  | snv      | C>C/A/T   | p.Gly12Val/Asp    | 5.56             | 1,4                       | 59     |
| <i>NTRK1</i>  | 1          | 156830779  | snv      | G>G/A     | p.Gly18Glu        | 44.72; 50.86     | 2,9                       | 12; 48 |
| <i>NUP98</i>  | 11         | 3726454    | snv      | G>G/A     | p.His1020Tyr      | 40.43            | 1,4                       | 21     |
| <i>NUP98</i>  | 11         | 3727796    | snv      | T>T/G     | p.Asp935Ala       | 48.51            | 1,4                       | 53     |
| <i>PBRM1</i>  | 3          | 52582243   | snv      | G>G/A     | p.Arg1529Cys      | 38.16            | 1,4                       | 8      |
| <i>PDGFRA</i> | 4          | 55127448   | snv      | G>G/A     | p.Gly79Asp        | 39.58; 49.32     | 2,8                       | 9; 24  |
| <i>PDGFRA</i> | 4          | 55151579   | snv      | G>G/C     | p.Gly789Arg       | 46.87            | 1,4                       | 27     |
| <i>PDGFRB</i> | 5          | 149499072  | snv      | C>C/T     | p.Arg919Gln       | 44.65            | 1,4                       | 63     |
| <i>PHF6</i>   | X          | 133547928  | snv      | G>G/T     | p.Glu221Ter       | 20.89            | 1,4                       | 53     |
| <i>PHLPP1</i> | 18         | 60383883   | snv      | T>T/C     | p.Ser323Pro       | 44.65            | 1,4                       | 49     |
| <i>PTPN11</i> | 12         | 112910793  | snv      | G>G/A     | p.Gly268Ser       | 46.23            | 1,4                       | 38     |
| <i>RAD21</i>  | 8          | 117859898  | deletion | GAT>GAT/G | p.Ile579GlnfsTer4 | 7.03             | 1,4                       | 30     |
| <i>RARA</i>   | 17         | 38506138   | snv      | C>C/T     | p.Arg144Ter       | 50               | 1,4                       | 25     |
| <i>RET</i>    | 10         | 43613833   | snv      | C>C/T     | p.Pro766Leu       | 59.83            | 1,4                       | 21     |
| <i>RET</i>    | 10         | 43613907   | snv      | T>T/A     | p.Tyr791Asn       | 48.29            | 1,4                       | 53     |

| Gene          | Chromosome | Coordinate | Type      | Variant                                                           | Change            | Alt Variant Freq                                               | % patients with variation | UPN               |
|---------------|------------|------------|-----------|-------------------------------------------------------------------|-------------------|----------------------------------------------------------------|---------------------------|-------------------|
| <i>RUNX1</i>  | 21         | 36206775   | snv       | G>G/A                                                             | p.Thr246Met       | 41.33                                                          | 1,4                       | 4                 |
| <i>RUNX1</i>  | 21         | 36231790   | snv       | A>A/C                                                             | p.Asp198Glu       | 36.59                                                          | 1,4                       | 49                |
| <i>RUNX1</i>  | 21         | 36231792   | snv       | C>C/T                                                             | p.Asp198Asn       | 40.82                                                          | 1,4                       | 38                |
| <i>RUNX1</i>  | 21         | 36231822   | snv       | T>T/C                                                             | p.Thr188Ala       | 29.09                                                          | 1,4                       | 24                |
| <i>RUNX1</i>  | 21         | 36252865   | snv       | C>C/T                                                             | p.Arg166Gln       | 3.29                                                           | 1,4                       | 49                |
| <i>RUNX1</i>  | 21         | 36252866   | snv       | G>G/A                                                             | p.Arg166Ter       | 41.6                                                           | 1,4                       | 39                |
| <i>RUNX1</i>  | 21         | 36252882   | snv       | G>G/C                                                             | p.Asp160Glu       | 12.21                                                          | 1,4                       | 43                |
| <i>RUNX1</i>  | 21         | 36252965   | insertion | T>T/TCA                                                           | p.Met133Ter       | 5.64                                                           | 1,4                       | 57                |
| <i>RUNX1</i>  | 21         | 36259166   | snv       | T>T/A                                                             | p.Asn109Tyr       | 33.17                                                          | 1,4                       | 38                |
| <i>RUNX1</i>  | 21         | 36259192   | snv       | G>G/A                                                             | p.Ser100Phe       | 16.51                                                          | 1,4                       | 61                |
| <i>RUNX1</i>  | 21         | 36259324   | snv       | A>A/G                                                             | p.Leu56Ser        | 51.4; 61.82;<br>47.45; 46.96                                   | 5,7                       | 1; 16; 22; 27     |
| <i>SETBP1</i> | 18         | 42281579   | snv       | G>G/A                                                             | p.Glu90Lys        | 3.57                                                           | 1,4                       | 37                |
| <i>SETBP1</i> | 18         | 42530501   | snv       | A>A/G                                                             | p.His399Arg       | 51.71                                                          | 1,4                       | 7                 |
| <i>SETBP1</i> | 18         | 42531907   | snv       | G>G/A                                                             | p.Asp868Asn       | 7.73                                                           | 1,4                       | 48                |
| <i>SETBP1</i> | 18         | 42532148   | snv       | G>G/A                                                             | p.Arg948His       | 46.87                                                          | 1,4                       | 47                |
| <i>SF3A1</i>  | 22         | 30741098   | snv       | T>T/C                                                             | p.Ile159Val       | 2.87                                                           | 1,4                       | 17                |
| <i>SF3B1</i>  | 2          | 198266593  | snv       | T>T/A                                                             | p.Lys748Met       | 9.81                                                           | 1,4                       | 30                |
| <i>SF3B1</i>  | 2          | 198266834  | snv       | T>T/C                                                             | p.Lys700Glu       | 37.21; Sanger;<br>30; 45; 24.66; 40;<br>Sanger; Sanger; Sanger | 12,8                      | 5; 27; 32; 34; 35 |
| <i>SF3B1</i>  | 2          | 198267359  | snv       | C>C/A                                                             | p.Lys666Asn       | 6.97                                                           | 1,4                       | 21                |
| <i>SF3B1</i>  | 2          | 198267360  | snv       | T>T/C                                                             | p.Lys666Arg       | 32.82; 39.23; 24.07; 7.06                                      | 5,7                       | 15; 33; 47; 57    |
| <i>SF3B1</i>  | 2          | 198267361  | snv       | T>T/C                                                             | p.Lys666Glu       | 21.82                                                          | 1,4                       | 50                |
| <i>SF3B1</i>  | 2          | 198267371  | snv       | G>G/T                                                             | p.His662Gln       | 3                                                              | 1,4                       | 27                |
| <i>SF3B1</i>  | 2          | 198267483  | snv       | C>C/T                                                             | p.Arg625His       | 20.36                                                          | 1,4                       | 5                 |
| <i>SF3B1</i>  | 2          | 198267484  | snv       | G>G/A                                                             | p.Arg625Cys       | 26.67                                                          | 1,4                       | 13                |
| <i>SF3B1</i>  | 2          | 198267491  | snv       | C>C/G                                                             | p.Glu622Asp       | 15.2                                                           | 1,4                       | 41                |
| <i>SMC1A</i>  | X          | 53436388   | snv       | C>C/T                                                             | p.Arg434Gln       | 39.26                                                          | 1,4                       | 20                |
| <i>SMC1A</i>  | X          | 53440030   | snv       | A>A/C                                                             | p.Leu225Arg       | 14.15                                                          | 1,4                       | 10                |
| <i>SMC3</i>   | 10         | 112361545  | snv       | T>T/C                                                             | p.Leu932Pro       | 4.56                                                           | 1,4                       | 26                |
| <i>SRSF2</i>  | 17         | 74732935   | deletion  | CGGCGGCTGTGGT<br>GTGAGTCCGGGG><br>CGGCGGCTGTGGT<br>GTGAGTCCGGGG/C | p.Pro95_Arg103del | 8.97; 12.5                                                     | 2,8                       | 43; 54            |

| Gene  | Chromosome | Coordinate | Type      | Variant                               | Change               | Alt Variant Freq | % patients with variation | UPN    |
|-------|------------|------------|-----------|---------------------------------------|----------------------|------------------|---------------------------|--------|
| STAG2 | X          | 123164903  | insertion | T>T/TC                                | p.His73ProfsTer14    | 26.15            | 1,4                       | 61     |
| STAG2 | X          | 123184977  | insertion | G>G/GAA                               | p.Val343LysfsTer2    | 46.88            | 1,4                       | 59     |
| STAG2 | X          | 123205051  | snv       | C>C/G                                 | p.Ser804Ter          | 13.18            | 1,4                       | 41     |
| STAG2 | X          | 123220440  | snv       | C>C/T                                 | p.Arg1033Ter         | 30.37            | 1,4                       | 24     |
| SUZ12 | 17         | 30302660   | snv       | C>C/G                                 | p.Leu251Val          | 15.36            | 1,4                       | 6      |
| TET2  | 4          | 106155868  | snv       | A>A/G                                 | p.Thr257Ala          | 43.17            | 1,4                       | 61     |
| TET2  | 4          | 106156432  | deletion  | CTT>CTT/C                             | p.Leu446LysfsTer8    | 21.39            | 1,4                       | 19     |
| TET2  | 4          | 106156551  | snv       | T>T/A                                 | p.Cys484Ter          | 32.42            | 1,4                       | 49     |
| TET2  | 4          | 106156729  | snv       | C>C/T                                 | p.Arg544Ter          | 51.4             | 1,4                       | 53     |
| TET2  | 4          | 106157181  | insertion | T>T/TA                                | p.Met695AsnfsTer17   | 19.02            | 1,4                       | 47     |
| TET2  | 4          | 106157554  | insertion | T>T/TA                                | p.Tyr819Ter          | 50.82            | 1,4                       | 52     |
| TET2  | 4          | 106157698  | snv       | T>T/C                                 | p.Tyr867His          | 49.44            | 1,4                       | 12     |
| TET2  | 4          | 106158243  | deletion  | CA>CA/C                               | p.Lys1049AsnfsTer6   | 25.72            | 1,4                       | 49     |
| TET2  | 4          | 106158479  | insertion | A>A/AG                                | p.Tyr1128IlefsTer2   | 27.02            | 1,4                       | 56     |
| TET2  | 4          | 106158509  | snv       | G>G/A                                 | splice_donor_variant | 16.2             | 1,4                       | 43     |
| TET2  | 4          | 106164068  | snv       | G>G/A                                 | p.Cys1193Tyr         | 11.03            | 1,4                       | 43     |
| TET2  | 4          | 106164913  | snv       | C>C/T                                 | p.Arg1261Cys         | 5.51             | 1,4                       | 41     |
| TET2  | 4          | 106164916  | snv       | C>C/T                                 | p.Arg1262Trp         | 30.19            | 1,4                       | 34     |
| TET2  | 4          | 106180790  | snv       | G>G/A                                 | p.Cys1273Tyr         | 33.42            | 1,4                       | 30     |
| TET2  | 4          | 106180817  | snv       | G>G/T                                 | p.Gly1282Val         | 15.31            | 1,4                       | 1      |
| TET2  | 4          | 106180857  | snv       | C>C/G                                 | p.Tyr1295Ter         | 7.21             | 1,4                       | 57     |
| TET2  | 4          | 106190828  | snv       | C>C/G                                 | p.Ser1369Ter         | 41.86            | 1,4                       | 31     |
| TET2  | 4          | 106193748  | snv       | C>C/T                                 | p.Arg1404Ter         | 19.76            | 1,4                       | 41     |
| TET2  | 4          | 106193931  | snv       | C>C/T                                 | p.Arg1465Ter         | 29.72            | 1,4                       | 30     |
| TET2  | 4          | 106196726  | snv       | C>C/T                                 | p.Gln1687Ter         | 44.15            | 1,4                       | 31     |
| TET2  | 4          | 106196819  | snv       | G>G/T                                 | p.Val1718Leu         | 49.78            | 1,4                       | 54     |
| TET2  | 4          | 106196834  | snv       | C>C/T                                 | p.Pro1723Ser         | 53.57            | 1,4                       | 12     |
| TET2  | 4          | 106197167  | deletion  | CAGGGTGTGGCTTCT><br>CAGGGTGTGGCTTCT/C | p.Gln1834ArgfsTer7   | 3.74             | 1,4                       | 36     |
| TET2  | 4          | 106197308  | snv       | C>C/T                                 | p.His1881Tyr         | 24.16; 32.83     | 2,8                       | 19; 22 |

| Gene           | Chromosome | Coordinate | Type      | Variant       | Change                       | Alt Variant Freq | % patients with variation | UPN    |
|----------------|------------|------------|-----------|---------------|------------------------------|------------------|---------------------------|--------|
| <i>TIMM50</i>  | 19         | 39972581   | snv       | G>G/C         | p.Gly159Ala                  | 47.41            | 1,4                       | 41     |
| <i>TNFAIP3</i> | 6          | 138199760  | snv       | C>C/T         | p.Pro393Leu                  | 58.6; 49.51      | 2,8                       | 10; 44 |
| <i>TP53</i>    | 17         | 7577094    | snv       | G>G/A         | p.Arg282Trp                  | 19.92            | 1,4                       | 20     |
| <i>TP53</i>    | 17         | 7578190    | snv       | T>T/C         | p.Tyr220Cys                  | 22.77            | 1,4                       | 2      |
| <i>TP53</i>    | 17         | 7578282    | deletion  | GGCCA>GGCCA/G | p.Leu188ProfsTer58           | 2.51             | 1,4                       | 2      |
| <i>TP53</i>    | 17         | 7578394    | snv       | T>T/C         | p.His179Arg                  | 70.52            | 1,4                       | 40     |
| <i>U2AF1</i>   | 21         | 44514777   | snv       | T>T/C         | p.Gln157Arg                  | 32.49            | 1,4                       | 47     |
| <i>U2AF1</i>   | 21         | 44524456   | snv       | G>G/A         | p.Ser34Phe                   | 26.98; 17.78     | 2,8                       | 3; 46  |
| <i>UMODL1</i>  | 21         | 43504269   | snv       | C>C/G         | p.Pro132Arg                  | 46.56            | 1,4                       | 47     |
| <i>UMODL1</i>  | 21         | 43529782   | snv       | C>C/A         | p.Pro544Thr                  | 42.31            | 1,4                       | 45     |
| <i>UMODL1</i>  | 21         | 43546473   | snv       | G>G/A         | p.Val1184Met                 | 44.37            | 1,4                       | 8      |
| <i>ZRSR2</i>   | X          | 15818068   | deletion  | AAG>AAG/A     | p.Arg68AlafsTer5             | 61.05            | 1,4                       | 9      |
| <i>ZRSR2</i>   | X          | 15827361   | insertion | C>C/CGT       | p.Asp161TrpfsTer5            | 31.36            | 1,4                       | 18     |
| <i>ZRSR2</i>   | X          | 15827389   | snv       | C>C/T         | p.Arg169Ter                  | 6.76; 21.36      | 2,8                       | 1; 62  |
| <i>ZRSR2</i>   | X          | 15833945   | snv       | C>C/T         | p.Gln235Ter                  | 24.83            | 1,4                       | 41     |
| <i>ZRSR2</i>   | X          | 15841230   | insertion | C>C/CAGCCGG   | p.Gly438_Ser439<br>insSerArg | 36.82; 40.78     | 2,8                       | 40; 51 |
